# Supplementary material
Source: PubMed Central journal article supplement (PMC4430429)
Supplement: NIHMS670633-supplement-Supplementary_Material.pdf [file NIHMS670633-supplement-Supplementary_Material.pdf]

## SUPPLEMENTAL INFORMATION

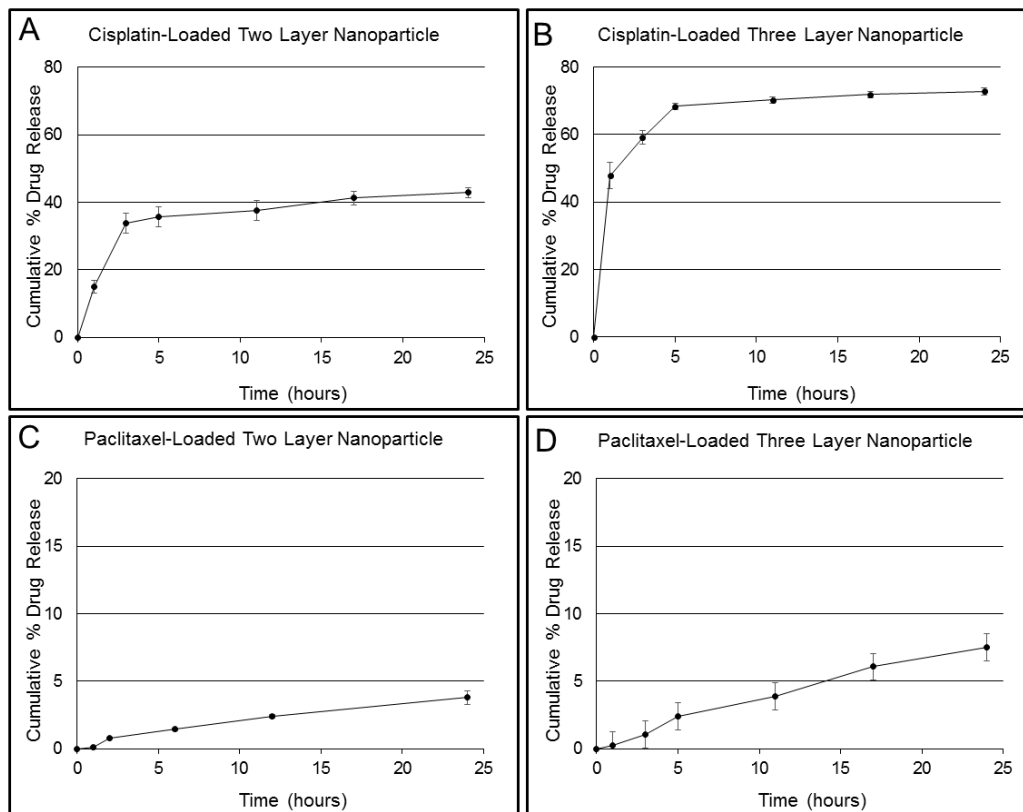

**Supplemental Figure 1:** Hydrophilic and hydrophobic drug release from gold nanoparticles during the first 24 hours. (A) Cisplatin-loaded two layer gold nanoparticles displayed an initial burst of  $35.7 \pm 2.3\%$  during the first 5 hours followed by a steady release. (B) Cisplatin-loaded three layer gold nanoparticles showed an initial burst of  $68.4 \pm 1.0\%$  of drug being released during the first 5 hours, after which a steady release followed. Paclitaxel-loaded (C) two and (D) three layer gold nanoparticles displayed no initial burst during the first 24 hours, with only  $3.8 \pm 0.1\%$  of drug being released from the two layer gold nanoparticles and  $7.5 \pm 1.0\%$  released from the three layer formulation by 24 hours.

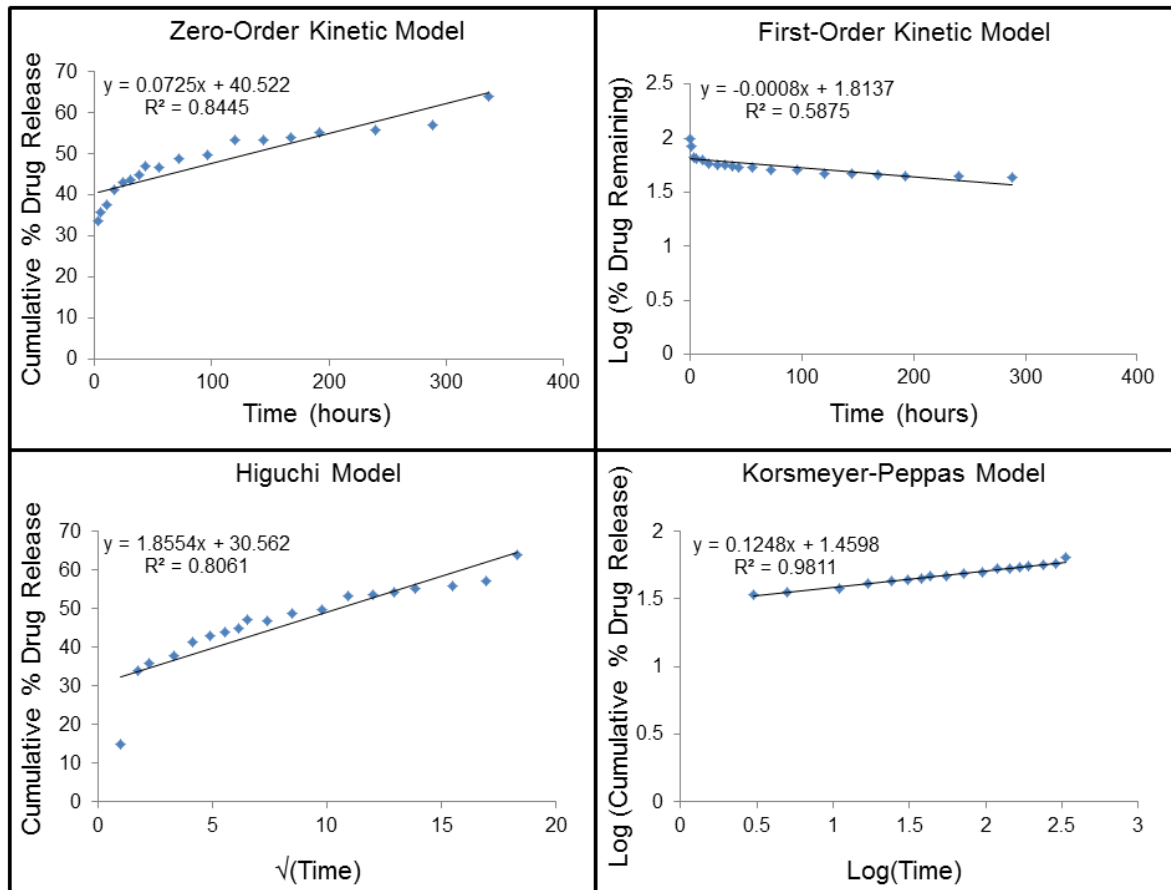

**Supplemental Figure 2:** Cisplatin release from two layer gold nanoparticles (points, representing average values) fitted to kinetic models (lines): zero-order kinetic model by plotting cumulative % drug release vs. time, first-order kinetic model by plotting log of % drug remaining vs. time, simplified Higuchi model by plotting cumulative % drug release vs. root time, and Korsmeyer-Peppas model by plotting log cumulative % drug release vs. log time. Drug release correlated best with the Korsmeyer-Peppas model ( $R^2 > 0.98$ ).

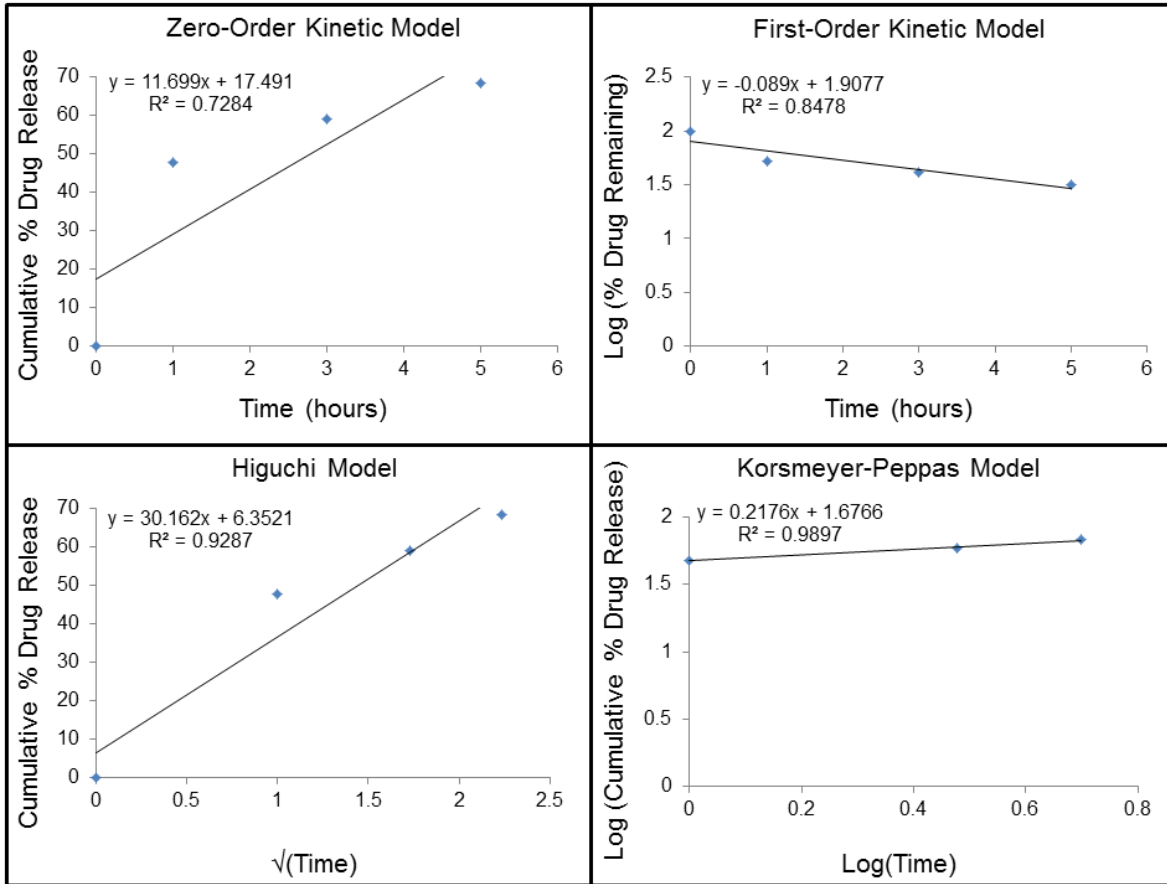

**Supplemental Figure 3:** Cisplatin release from three layer gold nanoparticles (points, representing average values) fitted to kinetic models (lines): zero-order kinetic model by plotting cumulative % drug release vs. time, first-order kinetic model by plotting log of % drug remaining vs. time, simplified Higuchi model by plotting cumulative % drug release vs. root time, and Korsmeyer-Peppas model by plotting log cumulative % drug release vs. log time. Drug release correlated best with the Korsmeyer-Peppas model ( $R^2 > 0.98$ ). Note that since >60% of loaded drug was released within the first 6 hours, fewer points were used for the model fitting.

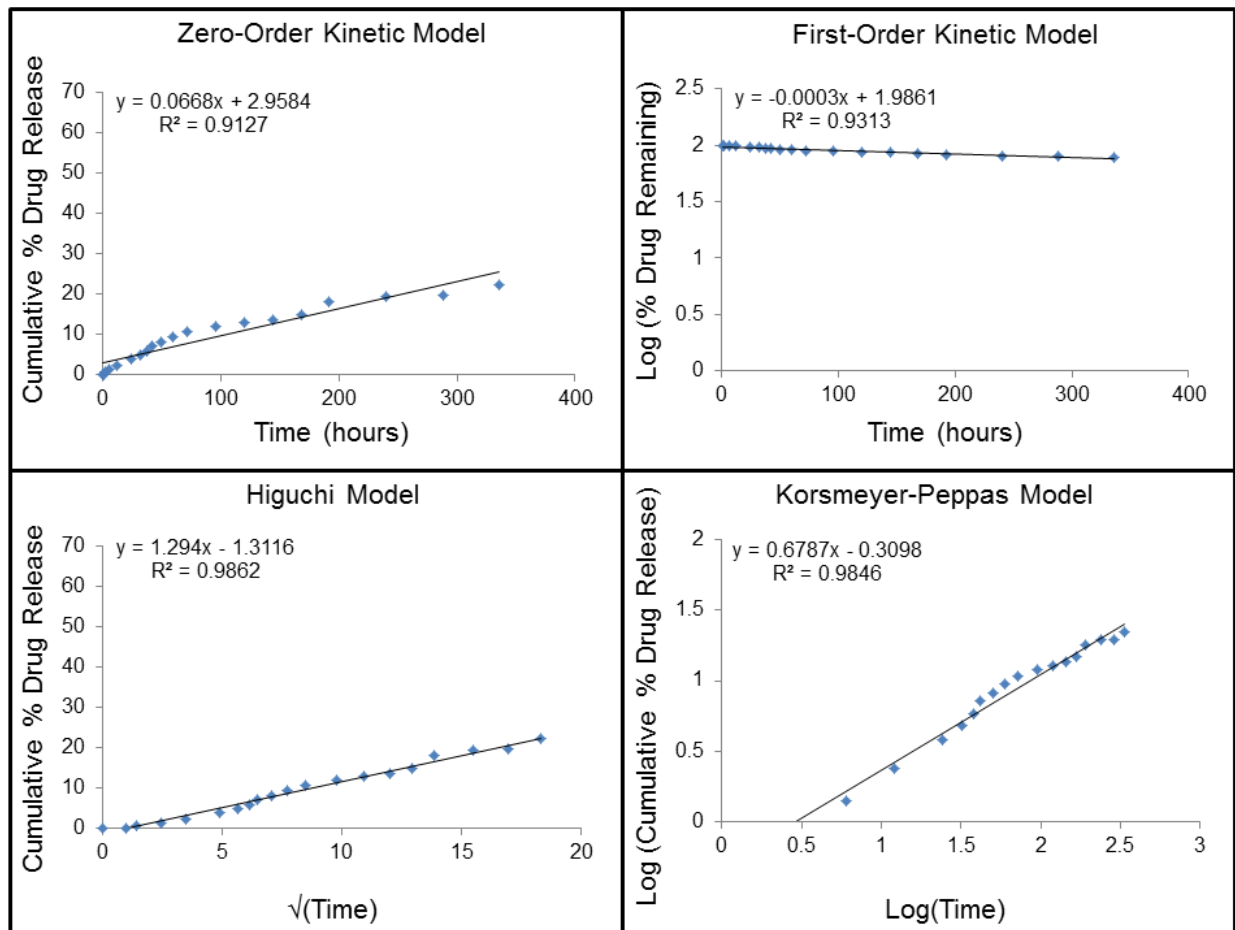

**Supplemental Figure 4:** Paclitaxel release from two layer gold nanoparticles (points, representing average values) fitted to kinetic models (lines): zero-order kinetic model by plotting cumulative % drug release vs. time, first-order kinetic model by plotting log of % drug remaining vs. time, simplified Higuchi model by plotting cumulative % drug release vs. root time, and Korsmeyer-Peppas model by plotting log cumulative % drug release vs. log time. Release correlated well with the zero-order kinetic and Korsmeyer-Peppas models, both with  $R^2 > 0.98$ .
